# Supplementary material for: Urban networks among Chinese cities along "the Belt and Road": A case of web search activity in cyberspace
Source: PubMed Central journal article supplement (PMC5714330; doi:10.1371/journal.pone.0188868), 2017-12-04
Supplement: pone.0188868.s001.pdf [file pone.0188868.s001.pdf]

S1 Table. Baidu index in 2011

|    | CQ   | SH   | FZ  | GZ   | HZ   | HK  | NN  | KM  | LS  | HB   | CC  | SY   | HH   | XN  | YC  | LZ  | XA   | UM  | CD  | ZZ   | WH   | CS  | NC  | HF  | TJ  | NB  | SZ  | ZJ | ST  | QD  | YT  | DL  | XM  | QZ  | SY | BJ  |
|----|------|------|-----|------|------|-----|-----|-----|-----|------|-----|------|------|-----|-----|-----|------|-----|-----|------|------|-----|-----|-----|-----|-----|-----|----|-----|-----|-----|-----|-----|-----|----|-----|
| CQ | 1887 | 345  | 112 | 218  | 160  | 94  | 101 | 235 | 65  | 101  | 97  | 103  | 80   | 63  | 70  | 88  | 217  | 95  | 312 | 177  | 183  | 130 | 104 | 114 | 153 | 127 | 254 | 61 | 69  | 99  | 75  | 99  | 112 | 115 | 39 | 528 |
| SH | 182  | 3808 | 172 | 276  | 361  | 110 | 132 | 143 | 59  | 171  | 151 | 172  | 121  | 68  | 85  | 106 | 228  | 122 | 179 | 312  | 245  | 158 | 171 | 212 | 275 | 262 | 303 | 67 | 92  | 165 | 111 | 165 | 150 | 152 | 48 | 786 |
| FZ | 73   | 161  | 887 | 121  | 92   | 60  | 75  | 63  | 13  | 64   | 63  | 67   | 52   | 24  | 40  | 57  | 76   | 52  | 74  | 85   | 99   | 73  | 75  | 71  | 80  | 76  | 104 | 28 | 56  | 67  | 56  | 66  | 135 | 131 | 11 | 196 |
| GZ | 126  | 254  | 111 | 1590 | 146  | 118 | 134 | 100 | 42  | 107  | 95  | 104  | 78   | 57  | 65  | 75  | 136  | 83  | 126 | 163  | 181  | 152 | 117 | 100 | 139 | 107 | 380 | 92 | 118 | 96  | 73  | 105 | 106 | 103 | 49 | 377 |
| HZ | 111  | 544  | 130 | 191  | 1796 | 76  | 111 | 88  | 31  | 111  | 96  | 106  | 78   | 51  | 62  | 73  | 140  | 77  | 117 | 176  | 162  | 115 | 123 | 140 | 160 | 248 | 180 | 54 | 69  | 110 | 77  | 108 | 115 | 102 | 31 | 517 |
| HK | 73   | 116  | 66  | 113  | 77   | 393 | 66  | 66  | 13  | 67   | 63  | 64   | 56   | 30  | 35  | 53  | 74   | 58  | 73  | 78   | 77   | 71  | 66  | 63  | 75  | 66  | 94  | 54 | 50  | 61  | 46  | 61  | 63  | 62  | 60 | 160 |
| NN | 82   | 166  | 76  | 153  | 100  | 66  | 755 | 77  | 14  | 73   | 70  | 73   | 57   | 33  | 44  | 57  | 91   | 62  | 88  | 95   | 101  | 85  | 75  | 73  | 93  | 77  | 137 | 58 | 58  | 71  | 58  | 71  | 74  | 71  | 15 | 227 |
| KM | 131  | 188  | 78  | 144  | 108  | 70  | 87  | 904 | 42  | 79   | 72  | 80   | 63   | 47  | 55  | 66  | 113  | 67  | 134 | 117  | 110  | 87  | 78  | 80  | 107 | 82  | 132 | 50 | 61  | 77  | 63  | 77  | 77  | 73  | 24 | 282 |
| LS | 75   | 140  | 59  | 92   | 76   | 50  | 54  | 54  | 750 | 57   | 55  | 58   | 57   | 36  | 51  | 66  | 105  | 85  | 79  | 100  | 77   | 64  | 56  | 64  | 78  | 59  | 90  | 19 | 37  | 59  | 49  | 55  | 58  | 54  | 5  | 236 |
| HB | 101  | 265  | 86  | 163  | 133  | 74  | 75  | 80  | 29  | 1874 | 208 | 182  | 112  | 47  | 60  | 67  | 122  | 68  | 104 | 135  | 118  | 91  | 81  | 95  | 246 | 98  | 151 | 46 | 62  | 108 | 77  | 154 | 82  | 78  | 35 | 569 |
| CC | 71   | 152  | 87  | 106  | 63   | 59  | 59  | 61  | 14  | 133  | 982 | 118  | 79   | 31  | 41  | 52  | 79   | 58  | 73  | 86   | 81   | 70  | 64  | 69  | 152 | 71  | 99  | 28 | 49  | 71  | 61  | 98  | 66  | 63  | 10 | 280 |
| SY | 98   | 251  | 85  | 157  | 130  | 73  | 75  | 79  | 35  | 980  | 145 | 1087 | 91   | 50  | 62  | 68  | 134  | 73  | 99  | 1469 | 125  | 90  | 82  | 96  | 185 | 97  | 160 | 48 | 62  | 96  | 73  | 119 | 82  | 79  | 29 | 461 |
| HH | 71   | 136  | 64  | 92   | 82   | 57  | 55  | 61  | 22  | 76   | 75  | 82   | 1191 | 30  | 62  | 61  | 94   | 59  | 77  | 87   | 80   | 68  | 62  | 67  | 138 | 66  | 89  | 21 | 42  | 70  | 57  | 72  | 61  | 59  | 9  | 357 |
| XN | 80   | 125  | 64  | 94   | 80   | 57  | 59  | 62  | 74  | 63   | 64  | 64   | 59   | 254 | 59  | 85  | 130  | 62  | 86  | 92   | 83   | 69  | 60  | 65  | 82  | 65  | 90  | 18 | 37  | 66  | 55  | 63  | 62  | 57  | 7  | 205 |
| YC | 75   | 126  | 62  | 92   | 80   | 54  | 56  | 62  | 21  | 67   | 62  | 66   | 83   | 49  | 469 | 82  | 136  | 64  | 78  | 103  | 79   | 67  | 61  | 63  | 87  | 64  | 90  | 21 | 39  | 65  | 51  | 64  | 61  | 59  | 8  | 233 |
| LZ | 92   | 170  | 74  | 114  | 97   | 65  | 65  | 69  | 56  | 73   | 69  | 75   | 70   | 77  | 82  | 639 | 215  | 83  | 97  | 107  | 95   | 79  | 72  | 74  | 100 | 75  | 111 | 36 | 56  | 74  | 63  | 71  | 70  | 71  | 18 | 253 |
| XA | 164  | 366  | 111 | 205  | 168  | 84  | 92  | 101 | 58  | 119  | 104 | 122  | 112  | 79  | 106 | 143 | 1804 | 117 | 164 | 269  | 176  | 120 | 106 | 122 | 192 | 121 | 323 | 56 | 68  | 119 | 85  | 115 | 100 | 93  | 29 | 621 |
| UM | 85   | 150  | 69  | 102  | 86   | 60  | 64  | 64  | 24  | 67   | 65  | 68   | 67   | 46  | 61  | 76  | 115  | 999 | 89  | 110  | 87   | 74  | 66  | 74  | 88  | 69  | 100 | 29 | 47  | 69  | 59  | 65  | 68  | 64  | 15 | 246 |
| CD | 223  | 385  | 107 | 177  | 186  | 196 | 94  | 85  | 33  | 112  | 91  | 99   | 75   | 50  | 60  | 69  | 131  | 73  | 974 | 153  | 138  | 104 | 100 | 110 | 144 | 169 | 158 | 55 | 66  | 95  | 71  | 97  | 100 | 89  | 18 | 438 |
| ZZ | 94   | 236  | 84  | 151  | 127  | 71  | 74  | 78  | 40  | 86   | 81  | 88   | 69   | 53  | 63  | 68  | 145  | 77  | 94  | 2803 | 131  | 88  | 83  | 96  | 124 | 96  | 168 | 49 | 62  | 84  | 69  | 84  | 81  | 80  | 22 | 352 |
| WH | 117  | 319  | 100 | 218  | 153  | 76  | 85  | 85  | 37  | 89   | 83  | 91   | 71   | 52  | 61  | 71  | 132  | 73  | 122 | 185  | 1136 | 138 | 112 | 125 | 139 | 112 | 236 | 53 | 66  | 91  | 71  | 93  | 93  | 90  | 25 | 418 |
| CS | 87   | 177  | 82  | 185  | 101  | 69  | 77  | 76  | 25  | 77   | 71  | 75   | 62   | 43  | 51  | 62  | 93   | 65  | 84  | 105  | 153  | 969 | 103 | 81  | 101 | 79  | 197 | 48 | 57  | 70  | 61  | 78  | 76  | 72  | 24 | 277 |
| NC | 86   | 207  | 102 | 149  | 123  | 69  | 73  | 73  | 24  | 74   | 72  | 75   | 64   | 44  | 50  | 60  | 97   | 62  | 92  | 107  | 121  | 92  | 906 | 90  | 101 | 90  | 155 | 45 | 62  | 73  | 61  | 72  | 83  | 81  | 19 | 266 |

|           |     |     |     |     |     |     |     |     |    |     |     |     |     |    |     |     |     |     |     |     |     |     |     |      |      |      |      |     |     |      |     |      |      |     |     |      |
|-----------|-----|-----|-----|-----|-----|-----|-----|-----|----|-----|-----|-----|-----|----|-----|-----|-----|-----|-----|-----|-----|-----|-----|------|------|------|------|-----|-----|------|-----|------|------|-----|-----|------|
| <b>HF</b> | 81  | 290 | 77  | 118 | 131 | 61  | 64  | 66  | 25 | 72  | 69  | 72  | 60  | 38 | 45  | 59  | 92  | 60  | 80  | 104 | 150 | 78  | 80  | 1334 | 109  | 95   | 128  | 30  | 48  | 80   | 60  | 83   | 73   | 69  | 11  | 293  |
| <b>TJ</b> | 92  | 224 | 82  | 130 | 111 | 72  | 71  | 73  | 28 | 116 | 101 | 114 | 92  | 48 | 63  | 70  | 126 | 73  | 91  | 149 | 113 | 84  | 78  | 89   | 1877 | 85   | 137  | 43  | 59  | 104  | 76  | 105  | 80   | 73  | 21  | 786  |
| <b>NB</b> | 95  | 509 | 87  | 139 | 281 | 66  | 72  | 69  | 18 | 81  | 76  | 80  | 63  | 38 | 58  | 64  | 99  | 64  | 90  | 119 | 125 | 85  | 91  | 92   | 106  | 1062 | 135  | 43  | 62  | 86   | 66  | 85   | 88   | 79  | 18  | 296  |
| <b>SZ</b> | 150 | 327 | 149 | 441 | 166 | 108 | 128 | 107 | 43 | 115 | 105 | 112 | 80  | 56 | 67  | 79  | 164 | 87  | 149 | 186 | 233 | 160 | 146 | 118  | 153  | 129  | 2334 | 77  | 121 | 103  | 76  | 114  | 123  | 116 | 45  | 528  |
| <b>ZJ</b> | 65  | 130 | 49  | 82  | 66  | 40  | 44  | 44  | 56 | 47  | 45  | 48  | 47  | 26 | 41  | 56  | 95  | 75  | 69  | 90  | 67  | 54  | 46  | 54   | 68   | 49   | 80   | 450 | 27  | 49   | 39  | 45   | 48   | 44  | 30  | 226  |
| <b>ST</b> | 77  | 134 | 69  | 225 | 80  | 59  | 64  | 62  | 8  | 58  | 57  | 62  | 43  | 20 | 27  | 39  | 80  | 44  | 76  | 88  | 79  | 79  | 66  | 60   | 77   | 66   | 167  | 56  | 588 | 64   | 47  | 62   | 81   | 71  | 7   | 181  |
| <b>QD</b> | 106 | 325 | 90  | 159 | 147 | 70  | 77  | 80  | 30 | 120 | 103 | 117 | 84  | 58 | 68  | 76  | 141 | 77  | 112 | 186 | 149 | 95  | 87  | 109  | 214  | 109  | 149  | 50  | 63  | 1335 | 162 | 111  | 84   | 80  | 17  | 573  |
| <b>YT</b> | 55  | 120 | 39  | 72  | 56  | 30  | 34  | 34  | 46 | 37  | 35  | 38  | 37  | 16 | 31  | 46  | 85  | 65  | 59  | 80  | 57  | 44  | 36  | 44   | 58   | 39   | 70   | 60  | 17  | 39   | 907 | 35   | 38   | 34  | 20  | 216  |
| <b>DL</b> | 108 | 312 | 93  | 162 | 147 | 72  | 78  | 82  | 28 | 225 | 176 | 312 | 101 | 49 | 65  | 72  | 128 | 76  | 111 | 156 | 135 | 98  | 85  | 99   | 192  | 104  | 156  | 45  | 64  | 115  | 96  | 1212 | 88   | 82  | 22  | 615  |
| <b>XM</b> | 113 | 416 | 248 | 243 | 207 | 76  | 86  | 85  | 28 | 90  | 82  | 89  | 70  | 51 | 61  | 70  | 124 | 72  | 117 | 142 | 168 | 112 | 117 | 99   | 136  | 163  | 195  | 57  | 91  | 88   | 67  | 89   | 1069 | 279 | 27  | 411  |
| <b>QZ</b> | 71  | 147 | 168 | 115 | 92  | 63  | 65  | 64  | 15 | 65  | 63  | 66  | 57  | 25 | 41  | 56  | 76  | 54  | 72  | 87  | 94  | 71  | 71  | 67   | 83   | 75   | 109  | 33  | 64  | 68   | 57  | 68   | 157  | 897 | 8   | 189  |
| <b>SY</b> | 121 | 226 | 84  | 162 | 129 | 315 | 77  | 81  | 35 | 112 | 86  | 91  | 71  | 48 | 57  | 65  | 122 | 69  | 132 | 129 | 114 | 93  | 76  | 80   | 127  | 89   | 136  | 56  | 62  | 80   | 64  | 86   | 84   | 76  | 151 | 358  |
| <b>BJ</b> | 197 | 516 | 156 | 291 | 230 | 118 | 138 | 146 | 60 | 234 | 199 | 224 | 212 | 74 | 101 | 121 | 274 | 139 | 193 | 372 | 245 | 174 | 155 | 177  | 657  | 167  | 291  | 70  | 92  | 189  | 130 | 193  | 134  | 138 | 48  | 4280 |

<sup>a</sup> CQ: Chongqing; SH: Shanghai; FZ: Fuzhou; GZ: Guangzhou; HZ: Hangzhou; HK: Haikou; NN: Nanning; KM: Kunming; LS: Lhasa; HB: Harbin; CC: Changchun; SY: Shenyang; HH: Hohhot; XN: Xining; YC: Yinchuan; LZ: Lanzhou; XA: Xi'an; UM: Urumqi; CD: Chengdu; ZZ: Zhengzhou; WH: Wuhan; CS: Changsha; NC: Nanchang; HF: Hefei; TJ: Tianjin; NB: Ningbo; SZ: Shenzhen; ZJ: Zhanjiang; ST: Shantou; QD: Qingdao; YT: Yantai; DL: Dalian; XM: Xiamen; QZ: Quanzhou; SY: Sanya; BJ: Beijing

<sup>b</sup> A few of default values have been interpolated according to the values in other years.
