# Supplementary material for: Urban networks among Chinese cities along "the Belt and Road": A case of web search activity in cyberspace
Source: PubMed Central journal article supplement (PMC5714330; doi:10.1371/journal.pone.0188868), 2017-12-04
Supplement: pone.0188868.s002.pdf [file pone.0188868.s002.pdf]

**S2 Table. Baidu index in 2014**

|    | CQ   | SH   | FZ   | GZ   | HZ   | HK  | NN   | KM   | LS   | HB   | CC   | SY   | HH   | XN  | YC  | LZ   | XA   | UM   | CD   | ZZ   | WH   | CS   | NC   | HF  | TJ  | NB  | SZ  | ZJ  | ST  | QD  | YT  | DL  | XM  | QZ  | SY  | BJ   |
|----|------|------|------|------|------|-----|------|------|------|------|------|------|------|-----|-----|------|------|------|------|------|------|------|------|-----|-----|-----|-----|-----|-----|-----|-----|-----|-----|-----|-----|------|
| CQ | 2975 | 633  | 287  | 640  | 503  | 181 | 229  | 326  | 134  | 220  | 188  | 204  | 176  | 140 | 143 | 218  | 505  | 204  | 848  | 387  | 485  | 321  | 238  | 301 | 390 | 219 | 508 | 124 | 145 | 214 | 138 | 181 | 244 | 229 | 75  | 903  |
| SH | 391  | 5462 | 404  | 638  | 1103 | 213 | 301  | 328  | 109  | 335  | 276  | 309  | 235  | 150 | 162 | 253  | 489  | 236  | 466  | 629  | 555  | 406  | 386  | 614 | 535 | 436 | 659 | 143 | 182 | 319 | 186 | 274 | 320 | 290 | 91  | 1401 |
| FZ | 161  | 321  | 1695 | 270  | 265  | 126 | 148  | 142  | 25   | 141  | 128  | 139  | 110  | 70  | 79  | 122  | 177  | 121  | 184  | 196  | 211  | 171  | 193  | 176 | 180 | 152 | 226 | 75  | 119 | 136 | 100 | 130 | 372 | 335 | 23  | 364  |
| GZ | 252  | 467  | 376  | 2573 | 383  | 207 | 306  | 223  | 66   | 205  | 176  | 190  | 156  | 114 | 124 | 171  | 275  | 167  | 304  | 329  | 378  | 356  | 264  | 262 | 296 | 184 | 804 | 179 | 213 | 185 | 132 | 170 | 237 | 206 | 87  | 670  |
| HZ | 243  | 1004 | 300  | 479  | 2997 | 158 | 202  | 202  | 61   | 231  | 194  | 218  | 168  | 112 | 123 | 172  | 306  | 159  | 282  | 389  | 363  | 278  | 282  | 398 | 387 | 386 | 373 | 115 | 140 | 228 | 143 | 204 | 234 | 204 | 68  | 937  |
| HK | 155  | 241  | 143  | 368  | 196  | 847 | 150  | 145  | 27   | 143  | 129  | 133  | 118  | 72  | 74  | 117  | 163  | 119  | 169  | 178  | 187  | 157  | 139  | 145 | 164 | 126 | 204 | 117 | 104 | 120 | 82  | 117 | 130 | 121 | 138 | 336  |
| NN | 179  | 339  | 179  | 447  | 262  | 144 | 1658 | 182  | 44   | 171  | 139  | 152  | 124  | 81  | 92  | 127  | 201  | 127  | 210  | 220  | 227  | 214  | 169  | 195 | 192 | 145 | 357 | 121 | 116 | 154 | 111 | 139 | 153 | 147 | 44  | 411  |
| KM | 449  | 773  | 365  | 812  | 602  | 203 | 351  | 2093 | 91   | 279  | 240  | 252  | 214  | 129 | 135 | 215  | 460  | 247  | 593  | 541  | 484  | 373  | 285  | 396 | 437 | 214 | 484 | 120 | 154 | 218 | 142 | 239 | 227 | 216 | 48  | 1046 |
| LS | 211  | 307  | 133  | 234  | 236  | 113 | 116  | 132  | 1123 | 139  | 117  | 122  | 113  | 77  | 105 | 185  | 224  | 102  | 371  | 233  | 198  | 155  | 117  | 135 | 175 | 127 | 204 | 68  | 80  | 129 | 96  | 117 | 120 | 119 | 24  | 509  |
| HB | 201  | 454  | 183  | 352  | 305  | 146 | 163  | 166  | 54   | 2364 | 404  | 347  | 216  | 96  | 117 | 149  | 247  | 133  | 232  | 272  | 249  | 199  | 174  | 227 | 393 | 165 | 284 | 96  | 122 | 213 | 145 | 275 | 169 | 155 | 62  | 884  |
| CC | 139  | 257  | 151  | 208  | 187  | 114 | 121  | 123  | 23   | 264  | 1441 | 217  | 151  | 64  | 78  | 107  | 160  | 113  | 154  | 176  | 163  | 146  | 127  | 154 | 242 | 123 | 178 | 51  | 78  | 144 | 106 | 181 | 128 | 120 | 21  | 427  |
| SY | 181  | 277  | 103  | 204  | 206  | 83  | 86   | 102  | 0    | 109  | 87   | 1020 | 83   | 47  | 75  | 155  | 194  | 125  | 341  | 203  | 168  | 125  | 87   | 105 | 145 | 97  | 174 | 38  | 50  | 99  | 66  | 87  | 90  | 89  | 51  | 479  |
| HH | 148  | 235  | 132  | 198  | 183  | 105 | 116  | 124  | 26   | 151  | 148  | 146  | 1721 | 75  | 120 | 130  | 193  | 118  | 167  | 182  | 168  | 143  | 125  | 142 | 217 | 118 | 168 | 47  | 67  | 134 | 93  | 132 | 124 | 115 | 16  | 494  |
| XN | 185  | 289  | 148  | 238  | 232  | 114 | 137  | 140  | 111  | 136  | 131  | 139  | 132  | 663 | 130 | 235  | 292  | 145  | 218  | 239  | 211  | 170  | 141  | 168 | 191 | 132 | 199 | 52  | 75  | 145 | 99  | 126 | 133 | 124 | 20  | 423  |
| YC | 165  | 264  | 136  | 214  | 209  | 103 | 122  | 129  | 45   | 141  | 127  | 137  | 193  | 110 | 795 | 204  | 279  | 135  | 190  | 221  | 189  | 149  | 129  | 155 | 187 | 124 | 180 | 49  | 76  | 138 | 92  | 126 | 126 | 119 | 12  | 406  |
| LZ | 202  | 333  | 170  | 286  | 259  | 136 | 154  | 156  | 102  | 163  | 143  | 157  | 157  | 193 | 178 | 1606 | 362  | 206  | 248  | 247  | 227  | 183  | 165  | 189 | 226 | 139 | 228 | 74  | 106 | 154 | 111 | 144 | 142 | 138 | 33  | 483  |
| XA | 351  | 743  | 267  | 537  | 453  | 164 | 208  | 227  | 117  | 243  | 206  | 239  | 243  | 178 | 195 | 355  | 3756 | 245  | 409  | 602  | 394  | 291  | 243  | 313 | 403 | 204 | 417 | 117 | 136 | 243 | 149 | 211 | 215 | 189 | 63  | 1065 |
| UM | 231  | 327  | 153  | 254  | 256  | 133 | 136  | 152  | 50   | 159  | 137  | 142  | 133  | 97  | 125 | 205  | 244  | 1330 | 391  | 253  | 218  | 175  | 137  | 155 | 195 | 147 | 224 | 88  | 100 | 149 | 116 | 137 | 140 | 139 | 44  | 529  |
| CD | 698  | 857  | 267  | 580  | 446  | 181 | 192  | 323  | 153  | 279  | 223  | 245  | 203  | 167 | 148 | 252  | 473  | 218  | 3907 | 423  | 507  | 336  | 230  | 277 | 383 | 262 | 527 | 129 | 131 | 257 | 154 | 242 | 234 | 207 | 74  | 1339 |
| ZZ | 263  | 643  | 212  | 415  | 350  | 152 | 152  | 191  | 91   | 210  | 164  | 171  | 147  | 98  | 110 | 150  | 301  | 152  | 480  | 2759 | 366  | 241  | 176  | 234 | 242 | 219 | 351 | 92  | 122 | 192 | 124 | 176 | 172 | 175 | 50  | 884  |
| WH | 285  | 766  | 236  | 563  | 387  | 163 | 169  | 216  | 72   | 218  | 172  | 195  | 143  | 102 | 113 | 151  | 297  | 140  | 562  | 413  | 2544 | 305  | 240  | 274 | 261 | 244 | 563 | 123 | 123 | 202 | 131 | 198 | 195 | 190 | 46  | 888  |
| CS | 184  | 409  | 176  | 456  | 258  | 134 | 152  | 168  | 30   | 160  | 127  | 147  | 118  | 94  | 85  | 118  | 214  | 121  | 402  | 234  | 343  | 1441 | 205  | 200 | 195 | 182 | 413 | 93  | 112 | 151 | 107 | 149 | 160 | 144 | 42  | 705  |
| NC | 183  | 376  | 226  | 352  | 335  | 131 | 160  | 152  | 42   | 154  | 138  | 148  | 130  | 78  | 92  | 131  | 194  | 123  | 206  | 224  | 281  | 233  | 1538 | 227 | 201 | 162 | 302 | 85  | 122 | 153 | 107 | 135 | 197 | 171 | 31  | 436  |

|           |     |     |     |      |      |     |     |     |     |     |     |     |     |     |     |     |     |     |     |     |     |     |     |      |      |      |      |     |     |      |     |      |      |      |     |      |
|-----------|-----|-----|-----|------|------|-----|-----|-----|-----|-----|-----|-----|-----|-----|-----|-----|-----|-----|-----|-----|-----|-----|-----|------|------|------|------|-----|-----|------|-----|------|------|------|-----|------|
| <b>HF</b> | 178 | 621 | 189 | 284  | 416  | 121 | 147 | 141 | 55  | 154 | 141 | 153 | 125 | 82  | 100 | 129 | 213 | 129 | 201 | 279 | 299 | 203 | 194 | 2813 | 261  | 182  | 257  | 78  | 98  | 166  | 118 | 140  | 160  | 146  | 21  | 500  |
| <b>TJ</b> | 203 | 422 | 183 | 331  | 295  | 141 | 160 | 162 | 56  | 248 | 208 | 238 | 200 | 108 | 121 | 164 | 250 | 151 | 222 | 313 | 259 | 202 | 180 | 234  | 2626 | 155  | 280  | 96  | 118 | 209  | 138 | 202  | 163  | 150  | 40  | 1441 |
| <b>NB</b> | 173 | 549 | 215 | 293  | 1255 | 127 | 143 | 144 | 33  | 165 | 151 | 154 | 126 | 75  | 105 | 130 | 205 | 122 | 198 | 250 | 244 | 190 | 197 | 241  | 235  | 1474 | 244  | 80  | 117 | 168  | 120 | 152  | 165  | 152  | 26  | 489  |
| <b>SZ</b> | 326 | 666 | 354 | 1437 | 488  | 218 | 317 | 260 | 86  | 248 | 202 | 223 | 172 | 125 | 133 | 197 | 353 | 179 | 381 | 417 | 493 | 417 | 340 | 353  | 363  | 226  | 3350 | 162 | 232 | 212  | 143 | 193  | 337  | 262  | 86  | 906  |
| <b>ZJ</b> | 161 | 257 | 83  | 184  | 186  | 63  | 66  | 82  | 32  | 89  | 67  | 103 | 63  | 27  | 55  | 135 | 174 | 105 | 321 | 183 | 148 | 105 | 67  | 85   | 125  | 77   | 154  | 870 | 30  | 79   | 46  | 67   | 70   | 69   | 31  | 459  |
| <b>ST</b> | 123 | 221 | 153 | 568  | 175  | 108 | 123 | 107 | 11  | 108 | 97  | 102 | 73  | 28  | 35  | 80  | 133 | 76  | 140 | 145 | 149 | 140 | 129 | 126  | 143  | 119  | 353  | 95  | 801 | 110  | 60  | 98   | 168  | 135  | 17  | 234  |
| <b>QD</b> | 227 | 571 | 203 | 360  | 409  | 137 | 166 | 179 | 61  | 259 | 216 | 219 | 190 | 126 | 135 | 176 | 327 | 162 | 277 | 402 | 319 | 236 | 199 | 302  | 510  | 195  | 280  | 103 | 122 | 1874 | 277 | 206  | 175  | 157  | 42  | 1051 |
| <b>YT</b> | 151 | 247 | 73  | 174  | 176  | 53  | 56  | 72  | 22  | 79  | 57  | 93  | 53  | 17  | 45  | 125 | 164 | 95  | 311 | 173 | 138 | 95  | 57  | 75   | 115  | 67   | 144  | 56  | 20  | 69   | 980 | 57   | 60   | 59   | 21  | 449  |
| <b>DL</b> | 217 | 504 | 202 | 348  | 360  | 140 | 167 | 178 | 49  | 0   | 328 | 611 | 221 | 101 | 122 | 166 | 280 | 160 | 351 | 348 | 283 | 217 | 189 | 256  | 516  | 175  | 276  | 93  | 123 | 221  | 165 | 1549 | 169  | 156  | 38  | 931  |
| <b>XM</b> | 274 | 701 | 892 | 680  | 564  | 163 | 211 | 218 | 65  | 220 | 182 | 210 | 163 | 116 | 124 | 172 | 331 | 161 | 307 | 373 | 404 | 311 | 320 | 292  | 366  | 262  | 559  | 124 | 201 | 198  | 135 | 186  | 1860 | 558  | 66  | 853  |
| <b>QZ</b> | 154 | 316 | 522 | 261  | 251  | 113 | 141 | 136 | 21  | 137 | 126 | 135 | 108 | 56  | 75  | 108 | 169 | 113 | 173 | 196 | 197 | 163 | 167 | 167  | 184  | 145  | 229  | 68  | 123 | 145  | 109 | 129  | 384  | 1281 | 17  | 361  |
| <b>SY</b> | 285 | 466 | 219 | 433  | 370  | 779 | 206 | 213 | 76  | 234 | 186 | 202 | 166 | 122 | 124 | 159 | 308 | 170 | 341 | 328 | 279 | 247 | 188 | 227  | 307  | 174  | 313  | 125 | 127 | 170  | 127 | 165  | 179  | 169  | 342 | 768  |
| <b>BJ</b> | 383 | 873 | 337 | 781  | 621  | 214 | 294 | 315 | 112 | 408 | 323 | 365 | 361 | 155 | 177 | 271 | 524 | 252 | 478 | 700 | 510 | 397 | 323 | 442  | 958  | 254  | 599  | 142 | 176 | 338  | 198 | 302  | 272  | 257  | 86  | 5444 |

<sup>a</sup> CQ: Chongqing; SH: Shanghai; FZ: Fuzhou; GZ: Guangzhou; HZ: Hangzhou; HK: Haikou; NN: Nanning; KM: Kunming; LS: Lhasa; HB: Harbin; CC: Changchun; SY: Shenyang; HH: Hohhot; XN: Xining; YC: Yinchuan; LZ: Lanzhou; XA: Xi'an; UM: Urumqi; CD: Chengdu; ZZ: Zhengzhou; WH: Wuhan; CS: Changsha; NC: Nanchang; HF: Hefei; TJ: Tianjin; NB: Ningbo; SZ: Shenzhen; ZJ: Zhanjiang; ST: Shantou; QD: Qingdao; YT: Yantai; DL: Dalian; XM: Xiamen; QZ: Quanzhou; SY: Sanya; BJ: Beijing

<sup>b</sup> A few of default values have been interpolated according to the values in other years.
