# Supplementary material for: Urban networks among Chinese cities along "the Belt and Road": A case of web search activity in cyberspace
Source: PubMed Central journal article supplement (PMC5714330; doi:10.1371/journal.pone.0188868), 2017-12-04
Supplement: pone.0188868.s003.pdf [file pone.0188868.s003.pdf]

**S3 Table. Baidu index in 2016**

|    | CQ   | SH   | FZ   | GZ   | HZ   | HK  | NN   | KM   | LS  | HB   | CC   | SY   | HH   | XN  | YC  | LZ   | XA   | UM   | CD   | ZZ   | WH   | CS   | NC   | HF  | TJ  | NB  | SZ  | ZJ  | ST  | QD  | YT  | DL  | XM  | QZ  | SY  | BJ   |
|----|------|------|------|------|------|-----|------|------|-----|------|------|------|------|-----|-----|------|------|------|------|------|------|------|------|-----|-----|-----|-----|-----|-----|-----|-----|-----|-----|-----|-----|------|
| CQ | 4181 | 958  | 305  | 754  | 556  | 212 | 261  | 365  | 150 | 268  | 230  | 263  | 202  | 156 | 162 | 262  | 607  | 221  | 1189 | 482  | 625  | 388  | 286  | 348 | 421 | 304 | 637 | 158 | 171 | 289 | 165 | 228 | 284 | 293 | 100 | 1199 |
| SH | 475  | 5345 | 361  | 785  | 858  | 219 | 255  | 331  | 99  | 361  | 292  | 312  | 222  | 157 | 161 | 249  | 546  | 217  | 936  | 557  | 627  | 388  | 315  | 537 | 474 | 462 | 673 | 162 | 176 | 324 | 192 | 280 | 291 | 297 | 93  | 1448 |
| FZ | 180  | 417  | 1480 | 287  | 259  | 121 | 136  | 143  | 26  | 158  | 132  | 138  | 105  | 66  | 78  | 116  | 205  | 105  | 345  | 204  | 235  | 175  | 174  | 183 | 186 | 181 | 248 | 81  | 110 | 145 | 101 | 136 | 307 | 320 | 29  | 420  |
| GZ | 294  | 623  | 247  | 2742 | 353  | 209 | 264  | 232  | 60  | 226  | 191  | 200  | 150  | 114 | 110 | 168  | 293  | 155  | 569  | 310  | 423  | 330  | 233  | 243 | 279 | 223 | 806 | 298 | 200 | 199 | 130 | 178 | 217 | 214 | 83  | 803  |
| HZ | 310  | 1277 | 299  | 578  | 2765 | 176 | 203  | 235  | 68  | 283  | 232  | 242  | 180  | 116 | 124 | 190  | 753  | 166  | 656  | 413  | 466  | 307  | 263  | 415 | 370 | 738 | 472 | 129 | 145 | 266 | 155 | 233 | 245 | 241 | 70  | 1166 |
| HK | 192  | 303  | 143  | 283  | 210  | 827 | 150  | 164  | 26  | 158  | 137  | 135  | 115  | 72  | 77  | 125  | 184  | 111  | 268  | 198  | 203  | 169  | 133  | 145 | 172 | 148 | 234 | 124 | 91  | 129 | 86  | 122 | 132 | 129 | 150 | 401  |
| NN | 237  | 452  | 191  | 455  | 281  | 157 | 1292 | 195  | 46  | 194  | 155  | 167  | 136  | 93  | 95  | 140  | 242  | 129  | 726  | 242  | 279  | 219  | 167  | 202 | 221 | 185 | 386 | 129 | 117 | 170 | 119 | 154 | 163 | 172 | 61  | 545  |
| KM | 260  | 421  | 175  | 345  | 260  | 138 | 170  | 1422 | 77  | 176  | 151  | 159  | 126  | 126 | 94  | 145  | 246  | 125  | 441  | 240  | 260  | 203  | 157  | 188 | 209 | 172 | 282 | 104 | 112 | 161 | 114 | 148 | 155 | 156 | 51  | 611  |
| LS | 179  | 221  | 124  | 203  | 163  | 87  | 106  | 144  | 278 | 130  | 103  | 119  | 95   | 107 | 65  | 138  | 161  | 99   | 303  | 170  | 168  | 143  | 103  | 123 | 138 | 123 | 175 | 59  | 54  | 113 | 79  | 113 | 111 | 106 | 15  | 314  |
| HB | 250  | 596  | 204  | 418  | 345  | 166 | 167  | 193  | 63  | 3294 | 499  | 350  | 218  | 94  | 107 | 153  | 275  | 132  | 535  | 287  | 305  | 229  | 187  | 235 | 393 | 211 | 350 | 109 | 124 | 239 | 149 | 301 | 180 | 178 | 68  | 1073 |
| CC | 157  | 310  | 141  | 230  | 239  | 113 | 121  | 123  | 17  | 296  | 1208 | 216  | 145  | 59  | 69  | 109  | 171  | 102  | 259  | 183  | 187  | 151  | 125  | 148 | 125 | 138 | 200 | 72  | 83  | 146 | 103 | 181 | 128 | 128 | 25  | 481  |
| SY | 197  | 415  | 163  | 301  | 261  | 132 | 137  | 152  | 33  | 287  | 238  | 1357 | 164  | 81  | 96  | 132  | 202  | 122  | 588  | 209  | 235  | 182  | 149  | 170 | 234 | 180 | 261 | 88  | 113 | 167 | 121 | 441 | 151 | 148 | 39  | 635  |
| HH | 177  | 298  | 141  | 234  | 219  | 114 | 128  | 138  | 31  | 168  | 158  | 168  | 1581 | 83  | 113 | 137  | 210  | 125  | 267  | 201  | 201  | 157  | 133  | 149 | 229 | 136 | 203 | 70  | 79  | 145 | 108 | 144 | 132 | 130 | 24  | 571  |
| XN | 208  | 346  | 146  | 268  | 227  | 110 | 136  | 141  | 101 | 143  | 133  | 141  | 133  | 664 | 116 | 270  | 290  | 145  | 336  | 231  | 243  | 179  | 134  | 165 | 197 | 149 | 229 | 73  | 84  | 149 | 97  | 134 | 133 | 129 | 24  | 501  |
| YC | 198  | 340  | 140  | 237  | 210  | 106 | 118  | 135  | 40  | 159  | 131  | 138  | 178  | 104 | 765 | 207  | 278  | 127  | 298  | 203  | 213  | 163  | 127  | 154 | 189 | 139 | 203 | 67  | 81  | 144 | 93  | 130 | 130 | 124 | 18  | 462  |
| LZ | 235  | 388  | 168  | 303  | 242  | 128 | 147  | 164  | 83  | 172  | 150  | 153  | 145  | 209 | 157 | 1200 | 331  | 180  | 400  | 240  | 252  | 194  | 153  | 184 | 223 | 164 | 252 | 105 | 102 | 160 | 109 | 146 | 145 | 147 | 32  | 545  |
| XA | 401  | 839  | 262  | 556  | 434  | 168 | 194  | 245  | 104 | 270  | 232  | 244  | 226  | 171 | 180 | 327  | 2347 | 210  | 700  | 560  | 450  | 294  | 221  | 300 | 404 | 252 | 454 | 128 | 134 | 262 | 151 | 230 | 216 | 209 | 66  | 1172 |
| UM | 208  | 332  | 145  | 256  | 248  | 124 | 131  | 144  | 59  | 147  | 136  | 140  | 130  | 110 | 115 | 212  | 247  | 1410 | 349  | 224  | 219  | 171  | 134  | 161 | 191 | 144 | 220 | 84  | 94  | 147 | 105 | 130 | 137 | 134 | 30  | 482  |
| CD | 711  | 839  | 267  | 581  | 444  | 183 | 194  | 322  | 153 | 280  | 222  | 248  | 203  | 164 | 144 | 253  | 458  | 214  | 3740 | 414  | 507  | 328  | 230  | 281 | 373 | 263 | 526 | 132 | 132 | 253 | 153 | 239 | 231 | 209 | 74  | 1305 |
| ZZ | 249  | 643  | 202  | 390  | 337  | 144 | 158  | 181  | 80  | 200  | 174  | 177  | 147  | 107 | 102 | 151  | 306  | 150  | 416  | 2647 | 343  | 227  | 174  | 245 | 287 | 215 | 344 | 100 | 120 | 190 | 128 | 170 | 169 | 175 | 49  | 815  |
| WH | 329  | 873  | 256  | 612  | 429  | 165 | 194  | 220  | 72  | 229  | 200  | 208  | 157  | 106 | 115 | 174  | 364  | 158  | 627  | 494  | 2820 | 362  | 284  | 349 | 315 | 257 | 610 | 128 | 135 | 230 | 139 | 197 | 213 | 211 | 62  | 986  |
| CS | 227  | 496  | 216  | 545  | 309  | 155 | 206  | 180  | 55  | 179  | 154  | 171  | 134  | 100 | 99  | 150  | 243  | 139  | 300  | 290  | 449  | 1891 | 309  | 232 | 232 | 195 | 471 | 118 | 130 | 178 | 124 | 163 | 183 | 173 | 63  | 615  |
| NC | 253  | 553  | 239  | 427  | 375  | 151 | 180  | 184  | 53  | 199  | 165  | 188  | 149  | 94  | 94  | 147  | 242  | 134  | 319  | 274  | 358  | 281  | 1723 | 256 | 248 | 218 | 377 | 111 | 142 | 197 | 131 | 165 | 222 | 212 | 63  | 587  |

|    |     |      |     |      |      |     |     |     |     |     |     |     |     |     |     |     |     |     |     |     |     |     |     |      |      |      |      |     |     |      |     |      |      |      |     |      |
|----|-----|------|-----|------|------|-----|-----|-----|-----|-----|-----|-----|-----|-----|-----|-----|-----|-----|-----|-----|-----|-----|-----|------|------|------|------|-----|-----|------|-----|------|------|------|-----|------|
| HF | 216 | 889  | 189 | 324  | 363  | 125 | 147 | 155 | 61  | 181 | 243 | 168 | 126 | 88  | 90  | 140 | 255 | 129 | 771 | 272 | 323 | 218 | 187 | 2389 | 240  | 229  | 297  | 91  | 104 | 190  | 122 | 168  | 162  | 160  | 31  | 658  |
| TJ | 257 | 518  | 194 | 362  | 319  | 149 | 157 | 178 | 67  | 282 | 242 | 284 | 206 | 110 | 117 | 177 | 278 | 154 | 840 | 315 | 303 | 262 | 171 | 233  | 2447 | 194  | 312  | 100 | 117 | 236  | 148 | 225  | 169  | 167  | 57  | 1546 |
| NB | 215 | 755  | 211 | 351  | 1207 | 140 | 157 | 162 | 34  | 199 | 168 | 187 | 134 | 85  | 100 | 150 | 276 | 132 | 288 | 284 | 308 | 222 | 211 | 271  | 257  | 1730 | 294  | 102 | 128 | 217  | 139 | 180  | 193  | 187  | 45  | 600  |
| SZ | 444 | 1049 | 350 | 1546 | 567  | 250 | 342 | 303 | 101 | 308 | 241 | 279 | 197 | 144 | 145 | 237 | 428 | 196 | 619 | 493 | 691 | 496 | 410 | 373  | 399  | 307  | 4319 | 227 | 284 | 282  | 168 | 243  | 360  | 315  | 110 | 1224 |
| ZJ | 149 | 247  | 110 | 583  | 151  | 125 | 170 | 118 | 11  | 110 | 100 | 104 | 110 | 43  | 49  | 82  | 140 | 80  | 234 | 139 | 172 | 148 | 106 | 117  | 136  | 111  | 336  | 535 | 96  | 106  | 80  | 101  | 110  | 110  | 43  | 292  |
| ST | 142 | 263  | 152 | 583  | 171  | 104 | 116 | 107 | 9   | 111 | 102 | 113 | 111 | 32  | 41  | 78  | 136 | 74  | 203 | 144 | 167 | 137 | 118 | 123  | 145  | 133  | 339  | 110 | 609 | 115  | 76  | 106  | 159  | 152  | 17  | 274  |
| QD | 309 | 821  | 221 | 433  | 458  | 152 | 185 | 205 | 72  | 309 | 253 | 274 | 212 | 130 | 147 | 433 | 378 | 174 | 418 | 460 | 409 | 271 | 229 | 332  | 505  | 259  | 350  | 121 | 135 | 2202 | 298 | 245  | 204  | 190  | 61  | 1212 |
| YT | 137 | 253  | 109 | 169  | 148  | 86  | 93  | 102 | 13  | 143 | 113 | 119 | 100 | 49  | 44  | 100 | 142 | 82  | 255 | 154 | 145 | 121 | 89  | 114  | 149  | 118  | 151  | 47  | 45  | 278  | 636 | 125  | 109  | 94   | 12  | 387  |
| DL | 251 | 629  | 204 | 375  | 350  | 141 | 156 | 194 | 51  | 376 | 342 | 393 | 195 | 95  | 113 | 161 | 294 | 149 | 847 | 320 | 326 | 238 | 175 | 240  | 381  | 215  | 318  | 102 | 122 | 231  | 160 | 1362 | 177  | 173  | 51  | 993  |
| XM | 327 | 899  | 715 | 671  | 558  | 178 | 218 | 241 | 76  | 267 | 212 | 260 | 182 | 123 | 131 | 671 | 373 | 169 | 453 | 415 | 473 | 336 | 342 | 337  | 414  | 308  | 562  | 144 | 215 | 254  | 154 | 220  | 2012 | 849  | 87  | 990  |
| QZ | 182 | 417  | 363 | 303  | 261  | 119 | 137 | 145 | 26  | 164 | 139 | 148 | 106 | 67  | 75  | 120 | 208 | 108 | 394 | 213 | 233 | 179 | 159 | 175  | 201  | 181  | 264  | 84  | 122 | 160  | 111 | 143  | 410  | 1184 | 28  | 451  |
| SY | 361 | 608  | 222 | 483  | 404  | 787 | 220 | 243 | 90  | 277 | 218 | 243 | 184 | 128 | 125 | 483 | 339 | 177 | 476 | 371 | 349 | 285 | 223 | 259  | 333  | 217  | 354  | 141 | 138 | 212  | 141 | 194  | 198  | 196  | 493 | 867  |
| BJ | 449 | 1004 | 304 | 698  | 523  | 218 | 241 | 306 | 103 | 436 | 373 | 341 | 314 | 158 | 172 | 254 | 495 | 226 | 989 | 594 | 546 | 367 | 259 | 382  | 741  | 295  | 597  | 154 | 165 | 334  | 196 | 300  | 257  | 270  | 86  | 4424 |

<sup>a</sup> CQ: Chongqing; SH: Shanghai; FZ: Fuzhou; GZ: Guangzhou; HZ: Hangzhou; HK: Haikou; NN: Nanning; KM: Kunming; LS: Lhasa; HB: Harbin; CC: Changchun; SY: Shenyang; HH: Hohhot; XN: Xining; YC: Yinchuan; LZ: Lanzhou; XA: Xi'an; UM: Urumqi; CD: Chengdu; ZZ: Zhengzhou; WH: Wuhan; CS: Changsha; NC: Nanchang; HF: Hefei; TJ: Tianjin; NB: Ningbo; SZ: Shenzhen; ZJ: Zhanjiang; ST: Shantou; QD: Qingdao; YT: Yantai; DL: Dalian; XM: Xiamen; QZ: Quanzhou; SY: Sanya; BJ: Beijing

<sup>b</sup> A few of default values have been interpolated according to the values in other years.
